# Supplementary material for: Lycorine Induces autophagy-associated apoptosis by targeting MEK2 and enhances vemurafenib activity in colorectal cancer
Source: PubMed Central journal article supplement (PMC6977686; doi:10.18632/aging.102606), 2020-01-03
Supplement: aging-12-102606-s002..pdf [file aging-12-102606-s002..pdf]

**SUPPLEMENTARY FIGURES**

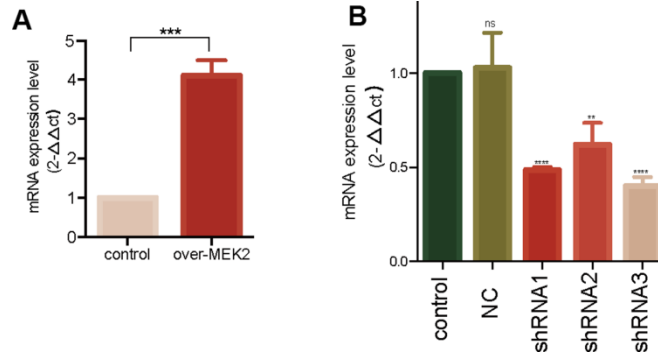

**Supplementary Figure 1.** (A) Mitogen-activated protein kinase kinase 2 (MEK2)-overexpressing cells were constructed by transfecting cells with GV146-MEK recombinant vectors and validated using q-PCR (\*\*p < 0.001). (B) HCT116 cells were transfected with MEK2 shRNA or scramble RNA and validated using q-PCR (\*\*p < 0.01, \*\*\*\*p < 0.0001).

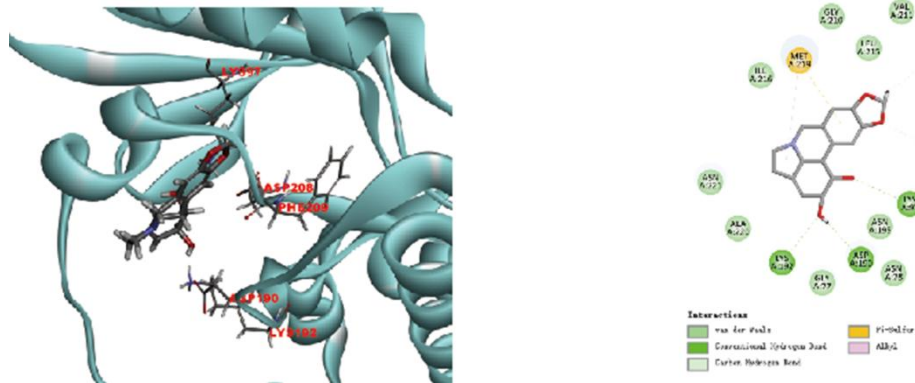

**Supplementary Figure 2.** CDOCKER predicts that lycorine has various interactions with mitogen-activated protein kinase kinase 1.
