# Supplementary material for: Lycorine induces autophagy-associated apoptosis by targeting MEK2 and enhances vemurafenib activity in colorectal cancer
Source: publisher site journal article supplement (doi:10.18632/aging.102606), 2020-01-03
Supplement: Supplementary file [file aging-v12i1-102606-supplementary-material-SD2.pdf]

## SUPPLEMENTARY TABLE

**Supplementary Table 1. Potential targets of lycorine were identified by SEADOCK and SWISSTARGET softwares.**

| <b>Biological Process</b>                                                                             | <b>Cellular Component</b>             | <b>Molecular function</b>         |
|-------------------------------------------------------------------------------------------------------|---------------------------------------|-----------------------------------|
| sensory perception of pain                                                                            | neuron projection                     | neuropeptide binding              |
| G-protein coupled receptor signaling pathway, coupled to cyclic nucleotide second messenger           | cell junction                         | epinephrine binding               |
| vasodilation by norepinephrine-epinephrine involved in regulation of systemic arterial blood pressure | integral component of plasma membrane | norepinephrine binding            |
| adenylate cyclase-activating adrenergic receptor signaling pathway                                    | invadopodium membrane                 | acetylcholinesterase activity     |
| cell-cell signaling                                                                                   | cell surface                          | protein homodimerization activity |
| regulation of smooth muscle contraction                                                               | postsynaptic membrane                 | cholinesterase activity           |
| endothelial cell migration                                                                            | acetylcholine-gated channel complex   | dipeptidyl-peptidase activity     |
| positive regulation of MAPK cascade                                                                   |                                       | acetylcholine receptor activity   |
